1 **Nuclease escape elements protect messenger RNA against cleavage by**  
2 **multiple viral endonucleases**

3

4 Mandy Muller<sup>1,2</sup>; Britt A. Glaunsinger<sup>1,3,4\*</sup>

5 1. Department of Plant and Microbial Biology, University of California, Berkeley, California,  
6 USA CA 94720-3370

7 2. Present address: Department of Microbiology, University of Massachusetts at Amherst,  
8 Amherst, MA 01003 USA.

9 3. Department of Cell and Molecular Biology, University of California, Berkeley, California,  
10 USA CA 94720-3370

11 4. Howard Hughes Medical Institute

12

13 \* Corresponding author; [glaunsinger@berkeley.edu](mailto:glaunsinger@berkeley.edu)

14 **Short Title:** Viral nuclease escape elements

15 **ABSTRACT**

16 During lytic Kaposi's sarcoma-associated herpesvirus (KSHV) infection, the viral endonu-  
17 clease SOX promotes widespread degradation of cytoplasmic messenger RNA (mRNA).  
18 However, select mRNAs, including the transcript encoding interleukin-6 (IL-6), escape SOX-  
19 induced cleavage. IL-6 escape is mediated through a 3' UTR RNA regulatory element that  
20 overrides the SOX targeting mechanism. Here, we reveal that this protective RNA element  
21 functions to broadly restrict cleavage by a range of homologous and non-homologous viral  
22 endonucleases. However, it does not impede cleavage by cellular endonucleases. The IL-6  
23 protective sequence may be representative of a larger class of nuclease escape elements, as  
24 we identified a similar protective element in the GADD45B mRNA. The IL-6 and GADD45B-  
25 derived elements display similarities in their sequence, putative structure, and several  
26 associated RNA binding proteins. However, the overall composition of their  
27 ribonucleoprotein complexes appears distinct, leading to differences in the breadth of  
28 nucleases restricted. These findings highlight how RNA elements can selectively control  
29 transcript abundance in the background of widespread virus-induced mRNA degradation.

30

## 31 **AUTHOR SUMMARY**

32 The ability of viruses to control the host gene expression environment is crucial to promote  
33 viral infection. Many viruses express factors that reduce host gene expression through  
34 widespread mRNA decay. However, some mRNAs escape this fate, like the transcript  
35 encoding the immunoregulatory cytokine IL-6 during KSHV infection. IL-6 escape relies on  
36 an RNA regulatory element located in its 3'UTR and involves the recruitment of a  
37 protective protein complex. Here, we show that this escape extends beyond KSHV to a  
38 variety of related and unrelated viral endonucleases. However, the IL-6 element does not  
39 protect against cellular endonucleases, revealing for the first time a virus-specific nuclease  
40 escape element. We identified a related escape element in the GADD45B mRNA, which  
41 displays several similarities with the IL-6 element. However, these elements assemble a  
42 largely distinct complex of proteins, leading to differences in the breadth of their protective  
43 capacity. Collectively, these findings reveal how a putative new class of RNA elements  
44 function to control RNA fate in the background of widespread mRNA degradation by viral  
45 endonucleases.

46

## 47 INTRODUCTION

48 A number of viruses restrict host gene expression to reduce competition for resources  
49 and dampen immune responses. This 'host shutoff' phenotype can be triggered through a  
50 range of mechanisms that operate at nearly every stage of the gene expression cascade.  
51 Viruses whose host shutoff strategies involve the induction of widespread mRNA decay  
52 include the alpha and gammaherpesviruses, vaccinia virus (VACV), influenza A virus (IAV),  
53 and SARS coronavirus (SCoV) [1-5] In each of the above cases, mRNA degradation is  
54 induced *via* one or more internal endonucleolytic cleavages in the target mRNA or, in the  
55 case of VACV, direct removal of the mRNA 5' cap [5-9]. This is invariably followed by  
56 exonucleolytic degradation of the cleaved fragment(s) by components of the mammalian  
57 RNA decay machinery such as Xrn1 [1,10,11].

58 The viral strategy contrasts with basal mRNA degradation in eukaryotes, which is a  
59 tightly regulated process that initiates with gradual shortening of the poly(A) tail, followed  
60 by removal of the 5' cap prior to exonucleolytic degradation of the transcript body [12].  
61 Although eukaryotes encode endonucleases, they are generally restricted to a highly  
62 specific set of targets. For example, mRNAs containing premature stop codons are cleaved  
63 by the Smg6 endonuclease during the translation-linked quality control process of  
64 nonsense mediated decay (NMD) [13]. No-go decay is another form of quality control  
65 activated in cases of ribosome stalling, although the specific endonuclease that cleaves the  
66 mRNA remains unknown [14,15]. The use of endonucleases during quality control enables  
67 more rapid removal of aberrant mRNAs from the translation pool, as their inactivation is  
68 not reliant on the prior rate limiting steps of deadenylation and decapping. In this regard,

69 virus-induced mRNA decay resembles the cellular quality control mechanisms, but with  
70 significantly expanded scope.

71 One of the well-studied viral endonucleases is the SOX protein encoded by ORF37 of  
72 Kaposi's sarcoma-associated herpesvirus (KSHV). During lytic KSHV replication, SOX is  
73 expressed with delayed early kinetics and its nuclease activity significantly reduces  
74 cytoplasmic mRNA levels [16]. SOX is conserved throughout the herpesvirus family, but  
75 only gammaherpesviral SOX homologs display ribonuclease activity in cells [16-18].  
76 Perhaps surprisingly, its activity is not restricted to host mRNAs, and studies with the SOX  
77 homolog from murine gammaherpesvirus 68 (MHV68) indicate that SOX activity helps fine  
78 tune viral mRNA levels in a manner important for the *in vivo* viral lifecycle [19,20].  
79 Although most mRNAs are subject to cleavage by SOX, a recent degradome-based  
80 sequencing analysis together with studies on individual endogenous and reporter mRNAs  
81 revealed that SOX cleavage sites are defined by a degenerate RNA motif [10,21]. The SOX-  
82 targeting motif can be located anywhere within an mRNA and may be present multiple  
83 times [10,21].

84 The observation that a targeting motif is present on SOX cleaved mRNAs suggests that  
85 transcripts lacking this element should escape cleavage. Indeed, RNAseq analyses indicate  
86 that approximately one-third of mRNAs are not depleted by SOX [22,23]. Studying these  
87 'escapees' in aggregate is complicated, however, by the fact that multiple mechanisms can  
88 promote apparent escape. These include lack of a targeting motif, indirect transcriptional  
89 effects, and active evasion of cleavage [22,24-28]. This latter phenotype, termed dominant  
90 escape, is particularly notable as it involves a specific RNA element whose presence in the  
91 3' UTR of an mRNA protects against SOX cleavage, regardless of whether the RNA contains

92 a targeting motif. The one known example of dominant escape derives from the host  
93 interleukin-6 (IL-6) transcript [26,27,29].

94 IL-6 expression is required for survival of B cells infected with KSHV, and the virus  
95 engages a number of strategies to drive production of this cytokine [30-38]. The IL-6 mRNA  
96 is directly refractory to SOX cleavage and thus remains robustly induced during host  
97 shutoff due to the presence of a specific ‘SOX resistance element’ (SRE) [26,29]. Even in the  
98 absence of infection, reporter mRNAs bearing the IL-6 SRE remain stable in SOX-expressing  
99 cells, an observation that has helped delineate features of this novel RNA element required  
100 for the protective phenotype [26,27]. The IL-6 SRE was fine mapped to a 200 nt sequence  
101 within the 3’ UTR, which was subsequently shown to assemble an ‘escape complex’ of at  
102 least 8 cellular RNA binding proteins involved in protection [26,27]. How this complex  
103 functions to restrict SOX recognition remains largely unknown, although nucleolin (NCL)  
104 plays an essential role. NCL is partially relocalized from the nucleolus to the cytoplasm  
105 during lytic KSHV infection, where it binds the SRE using its RNA recognition motif and  
106 engages in protein-protein interactions related to escape with its carboxyl-terminal RGG  
107 domain [27].

108 The IL-6 SRE is the first described ribonuclease escape element and much remains to  
109 be learned about its function, as well as whether other related elements exist that protect  
110 their associated mRNA. Here, we reveal that the IL-6 SRE is broadly protective against a  
111 diverse group of viral endonucleases, suggesting an underlying commonality in the  
112 mechanism by which these host shutoff factors recognize their mRNA targets. It is not  
113 indiscriminately protective, however, as host quality control endonucleases are not  
114 blocked by the IL-6 SRE. We then identify a second, novel SRE within the GADD45B mRNA,

115 which displays some physical and functional similarities to the IL-6 SRE. Collectively, these  
116 findings suggest that a diversity of nuclease escape elements exist, and that their  
117 characterization may lead to new insights into the control of mRNA fate in both infected  
118 and uninfected cells.

119

120

## 121 **RESULTS**

### 122 **The IL-6 derived resistance element broadly protects against cleavage by viral but** 123 **not cellular endonucleases**

124 The 3' UTR of IL-6 contains a transferrable 200 nt SRE that protects its associated mRNA  
125 from SOX-induced degradation [26,27]. The SRE also protects mRNA from cleavage by the  
126 unrelated vhs endonuclease encoded by herpes simplex virus type 1 (HSV-1), hinting that  
127 this RNA element may restrict endonuclease targeting in a broader capacity [27]. To test  
128 this hypothesis, we assessed whether the presence of the SRE impacted the ability of a  
129 panel of homologous and heterologous mRNA-specific viral endonucleases to degrade a  
130 target mRNA. In addition to HSV-1 vhs, these included homologs of KSHV SOX from the  
131 related gammaherpesviruses Epstein-Barr virus (EBV; BGLF5) and murine  
132 gammaherpesvirus 68 (MHV68; muSOX), as well as the heterologous host shutoff  
133 endonuclease from influenza A virus (IAV; PA-X) [3,17,39]. As anticipated, the control GFP  
134 mRNA was readily degraded in 293T cells co-transfected with plasmids expressing each of  
135 the viral endonucleases as measured by RT-qPCR (**Fig. 1A**). However, addition of the IL-6  
136 derived SRE to the 3' UTR of GFP (GFP-IL-6-SRE) prevented each of the viral endonucleases  
137 from degrading this mRNA (**Fig. 1B**). Fusion of a size matched segment of the IL-6 3' UTR  
138 lacking the SRE to GFP (GFP-IL-6  $\Delta$ SRE) reinstated cleavage of the GFP reporter by the viral  
139 endonucleases (**Fig. 1B**). These data confirm that the protection conferred by the SRE is  
140 not specific to SOX-induced cleavage, but functions more broadly to restrict mRNA cleavage  
141 by a diverse set of mammalian virus host shutoff endonucleases.

142 Cleavage sites for IAV PA-X have yet to be determined, but the other endonucleases  
143 do not appear to target mRNA in the same location or using the same sequence features,



144 including the SOX homologs [1,9,21,40,41]. Thus, the IL-6 derived SRE is unlikely to  
145 function through steric occlusion of a common cleavage site. We instead considered the  
146 possibility that the SRE functions like an RNA 'zip code', directing its associated transcript  
147 to a location in the cell inaccessible to endonucleases. To test this hypothesis, we used RNA  
148 fluorescence *in situ* hybridization (FISH) to monitor how the presence of the IL-6 SRE  
149 impacted the localization of its associated mRNA. Six phage MS2-derived stem-loops were  
150 introduced upstream of the SRE or  $\Delta$ SRE segment of the IL-6 3' UTR in the pcDNA3  
151 luciferase reporter, enabling visualization of the RNA in transfected 293T cells using a Cy3-  
152 labeled RNA probe directed against the MS2 sequences [42]. We verified that the presence  
153 of the stem-loops did not prevent the escape of the SRE-containing reporter or degradation  
154 of the  $\Delta$ SRE reporter in SOX-expressing cells (**Fig. S1**). There was no distinguishable  
155 difference in the localization of the SRE and  $\Delta$ SRE containing mRNAs, both of which were  
156 present relatively diffusely throughout the cell (**Fig. 1C**). The FISH signal was specific to  
157 transfected cells, as we observed no fluorescence in neighboring untransfected cells nor  
158 autofluorescence from transfected cells lacking the Cy3 probes (**Fig. 1C**). Although these  
159 data do not exclude the possibility that the SRE-containing transcript became sequestered  
160 into micro-aggregates or other structures not visible at this level of resolution, they do not  
161 support relocalization as the driver of escape from viral endonuclease cleavage.

162  
163 We next considered whether the inability to cleave an IL-6 SRE-containing  
164 transcript was specific to viral endonucleases or similarly extended to host endonucleases.  
165 Although basal cellular mRNA decay is carried out by exonucleases, host quality control  
166 pathways involve endonucleases to promote rapid clearance of aberrant mRNA [43-45].

167 We applied two strategies to monitor the activity of the SRE against host endonucleases.  
168 The first was to use a nonsense mediated decay (NMD) target containing a premature  
169 termination codon (PTC) 100 amino acids into the body of an RFP reporter mRNA (dsRed2-  
170 PTC) [10]. The NMD pathway detects PTCs during translation and directs cleavage of the  
171 mRNA by the Smg6 endonuclease [46]. Depletion of Smg6 from 293T cells using siRNAs  
172 restored dsRed2-PTC mRNA levels to those of the control dsRed2 transcript, confirming  
173 that this was an NMD substrate degraded by Smg6 (**Fig. 2A-B**). We then fused the IL-6  
174 derived SRE to the 3' UTR of dsRed2-PTC (dsRed2-PTC-SRE) or, as a control, the size  
175 matched region from the IL-6 3' UTR lacking the SRE (dsRed2-PTC- $\Delta$ SRE) and measured  
176 the levels of each mRNA by RT-qPCR in 293T cells (**Fig. 2C**). In contrast to the viral  
177 endonucleases, the SRE did not impair Smg6-mediated cleavage of its target mRNA, as all  
178 three PTC-containing transcripts were similarly degraded (**Fig. 2A & 2C**).

179 The second strategy to monitor host endonuclease activity was to express the nsp1  
180 protein from SARS coronavirus. Nsp1 is not itself a nuclease, but it binds the 40S ribosome  
181 and causes it to stall on the mRNA, thus activating cleavage of the mRNA by an as yet  
182 unknown cellular endonuclease via a mechanism reminiscent of no-go decay [47,48].  
183 Although the endonuclease involved in this pathway has not been established, it is known  
184 not to be Smg6 and thus this enabled evaluation of a distinct host endonuclease [48]. Nsp1  
185 was co-transfected with the GFP-SRE or GFP- $\Delta$ SRE reporter into 293T cells, and depletion  
186 of the GFP transcript was measured by RT-qPCR. Similar to the NMD substrate, the SRE did  
187 not prevent degradation of the GFP mRNA in nsp1-expressing cells (**Fig. 2D**). Collectively,  
188 these results suggest that the IL-6 derived SRE confers broad protection against viral but  
189 not cellular endonucleases. Given that the host endonucleases require ongoing translation

190 for target recognition, these data also confirm that the SRE does not pull its associated  
191 mRNA out of the translation pool.

192

193 **GADD45B mRNA is also resistant to SOX-induced degradation.**

194 To determine whether this property of broad inhibition of viral endonucleases was  
195 restricted to the IL-6 SRE, we sought to identify other SRE-bearing transcript(s). Based on  
196 our previous finding that the IL-6 SRE required binding by a complex of cellular proteins  
197 including NCL, we mined a published RNAseq dataset for transcripts that were not  
198 depleted in SOX expressing 293T cells and were known to be bound by NCL [22,49-51]. A  
199 transcript that fit these criteria was growth arrest and DNA damage-inducible 45 beta  
200 (GADD45B). Notably, the GADD45B mRNA was also previously shown to escape  
201 degradation in HSV-1 vhs-expressing cells, further suggesting it might contain an SRE [52-  
202 54]. We first examined whether the GADD45B mRNA was resistant to host shutoff upon  
203 lytic reactivation of a KSHV-positive B cell line (TREX-BCBL1) and a renal carcinoma cell  
204 line stably expressing the KSHV BAC16 (iSLK.219). Both TREX-BCBL1 and iSLK.219 cells  
205 harbor a doxycycline (dox)-inducible version of the major viral lytic transactivator RTA  
206 that promotes entry into the lytic cycle upon dox treatment [55,56]. Unlike the GAPDH  
207 mRNA, which is degraded by SOX upon lytic reactivation, the GADD45B mRNA levels  
208 remained unchanged both in reactivated TREX-BCBL1 and iSLK.219 cells as measured by  
209 RT-qPCR (**Fig. 3A & 3B**). We also confirmed that, unlike the GAPDH mRNA, the endogenous  
210 GADD45B mRNA was not depleted upon transfection of KSHV SOX or HSV-1 vhs into 293T  
211 cells (**Fig. 3C**). Finally, we noted that siRNA-based depletion of GADD45B from iSLK.219  
212 cells resulted in decreased efficiency of lytic KSHV reactivation as well as reduced

213 expression of representative delayed early (ORF59) and late (K8.1) viral genes, suggesting  
214 that GADD45B expression is important for the KSHV lytic cycle (**Fig. S2**).

215         Recently, we showed that KSHV SOX cleaves its targets at a specific but degenerate  
216 RNA motif [21]. Thus, the failure of SOX (or perhaps vhs) to degrade the GADD45B mRNA  
217 could either be due to the absence of such a targeting motif (e.g. passive escape), or to the  
218 presence of a specific protective element like the IL-6 SRE (e.g. dominant escape). To  
219 distinguish these possibilities, we constructed chimeras between GFP, which has a well-  
220 characterized SOX cleavage element, and the GADD45B 5' UTR, 3' UTR, or coding region  
221 (CDS), each of which were cloned downstream of the GFP coding region (**Fig. 3D**). Co-  
222 transfection of the GFP-fused GADD45B 3' UTR construct with SOX into 293T cells did not  
223 lead to degradation of this mRNA, whereas the GFP-GADD45B 5' UTR or CDS fusions were  
224 readily degraded in SOX-expressing cells (**Fig. 3E**). Thus, similar to the IL-6 3' UTR, the  
225 GADD45B 3' UTR contains a protective sequence that prevents SOX cleavage of an  
226 established target mRNA.

227

228 **Hairpin structures within the GADD45B and IL-6 SREs are important for conferring**  
229 **resistance to SOX cleavage**

230         To refine which GADD45B sequence encompassed the SRE, we initially looked for  
231 similarities between the GADD45B 3' UTR and the IL-6 SRE using Clustal W alignment.  
232 While there were no stretches of significant sequence identity between the two RNAs, the  
233 last ~200nt of the GADD45B 3'UTR had the highest similarity (~46%) to the IL-6 SRE (**Fig.**  
234 **S3**). We therefore fused this putative SRE segment of the GADD45B 3' UTR to GFP  
235 (GADD45B-SRE), and found that it was sufficient to confer nearly the same level of

236 protection from SOX as the full GADD45B 3' UTR in transfected 293T cells (**Fig. 4A**). Thus,  
237 similar to IL-6, the GADD45B 3' UTR contains a ~200 nt SRE (henceforth termed G-SRE).

238 We next sought to determine whether these two SREs could adopt a common  
239 secondary structure. RNAfold-based predictions showed that the 3'-most segment of both  
240 SREs form a long stem-loop protruding structure with at least one bulge near the middle of  
241 the stem, whereas the other regions of the SREs did not fold into any similar high-  
242 confidence structures (**Fig. 4B**). To validate this predicted SRE stem loop structure  
243 experimentally, we applied in-line probing, an RNA cleavage assay in which base-paired or  
244 structurally constrained nucleotides are protected from spontaneous phosphodiester bond  
245 hydrolysis [57]. Results from the cleavage reaction (**Fig. S4**) largely confirmed the RNAfold  
246 predictions, apart from a small variation in the IL-6 hairpin. We then tested whether this  
247 structure is required for either IL-6 SRE or G-SRE function by changing two conserved TT  
248 nucleotides located directly adjacent to the bulge in each hairpin structure to GG (SRE\_GG;  
249 mutated residues marked with asterisks Fig. 4B). We also separately mutated the AA  
250 residues predicted to base pair with these nucleotides on the other side of the loop to CC  
251 (SRE\_CC). Both the SRE\_GG and the SRE\_CC mutations in the IL-6 or GADD45B GFP fusions  
252 resulted in partial degradation of these mRNAs upon SOX expression in 293T cells,  
253 suggesting that disruption of that portion of the SRE hairpin impaired the protective  
254 capacity of each SRE (**Fig. 4C & 4D**). Notably, combining these mutations together  
255 (SRE\_GG+CC), which should restore the secondary structure of the stem-loop, rescued the  
256 fully protective phenotype in SOX expressing cells (**Fig. 4C & 4D**). This suggests that, at  
257 least for this region of each SRE, RNA structure rather than the specific sequence is  
258 important for protection against SOX cleavage.

259 **The GADD45B and IL-6 SREs assemble a partially overlapping ribonucleoprotein**  
260 **complex**

261 Using an *in vitro* RNA-pulldown based strategy, we previously determined that the  
262 IL-6 SRE assembles a specific ribonucleoprotein (RNP) ‘escape’ complex that is critical for  
263 its ability to mediate protection from cleavage by SOX [26,27]. Given the partial similarities  
264 in length, sequence, and structure between the IL-6 SRE and the G-SRE, we hypothesized  
265 that they might also assemble a similar set of RNPs to mediate their protective function.  
266 Indeed, it had already been established that both transcripts bind NCL [27,49]. We  
267 therefore performed Comprehensive Identification of RNA binding Proteins by Mass  
268 Spectrometry (ChIRP-MS) to compare the set of proteins bound *in vivo* to the IL-6 and  
269 GADD45B 3’UTRs in transfected 293T cells (**Fig. 5A**). Briefly, ChIRP-MS involves purifying  
270 an RNA of interest along with its associated proteins from crosslinked, sonicated cells using  
271 specific RNA probe-based capture, then identifying the bound proteins by MS [58]. Control  
272 probes directed against GFP were included to identify nonspecific interactions, which were  
273 then filtered out of the dataset. Using ChIRP-MS, we identified 195 proteins associated with  
274 the GADD45B 3’UTR and 245 proteins associated with the IL-6 3’UTR, of which 124 were in  
275 common between the two sets (**Table S1 & Fig. S5**). Many of the proteins previously  
276 identified as bound to the IL-6 SRE (**Fig. 5B**, gray nodes; [27]) were also recovered using  
277 ChIRP-MS for the IL-6 3’ UTR and were similarly associated with the GADD45B 3’ UTR  
278 (**Table S2 & Fig. 5B**, purple nodes). We sought to independently validate a subset of these  
279 common interactors by western blot following ChIRP (**Fig. 5C**). Again, we recovered NCL  
280 and HuR (also known as ELAVL1), two proteins that were previously identified as  
281 important for IL-6 escape from SOX degradation [26,27]. We also confirmed hnRNPU, a

282 protein that binds the IL-6 SRE but is not required for escape of the IL-6 SRE from SOX [27].  
283 However, other IL-6 SRE-bound proteins required for its escape function were not detected  
284 on the GADD45B 3' UTR by ChIRP-western blot, including IGF2BP1, STAU1, ZC3HAV1,  
285 YTHDC2, NPM1, and hnRNPD (**Fig. 5C**). The fact that IGF2BP1 and NPM1 were recovered  
286 in the GADD45B and IL-6 ChIRP-MS experiments but not in the ChIRP-western blots likely  
287 reflects differences in sensitivity between MS and western blotting.

288 To further validate the interactions with NCL, HuR, and hnRNPU, we  
289 immunoprecipitated (IP) each endogenous protein from 293T cells and performed RT-qPCR  
290 to measure the level of co-precipitating endogenous GADD45B RNA. We observed a >5-  
291 fold enrichment of GADD45B mRNA over the mock (IgG) IP for both NCL and HuR, although  
292 we were not able to detect an association with hnRNPU in this assay (data not shown) (**Fig.**  
293 **5D**). We confirmed that the interaction occurs on the GADD45B 3'UTR by performing the  
294 IPs from cells transfected with a GFP reporter fused to either the GADD45B 5' UTR or 3'  
295 UTR (**Fig. 5E**). The structurally compromised mutant GADD45B 3'UTR\_GG described in Fig.  
296 4B failed to interact with NCL and HuR, confirming that the stem-loop structure in the SRE  
297 is important for protein binding (**Fig. 5E**). Collectively, these data suggest that while there  
298 is some overlap between the sequence, structure, and RNA binding proteins associated  
299 with the GADD45B and IL-6 SREs, these elements likely assemble distinct RNP complexes  
300 and thus may function in a related but non-identical manner.

301

302

303 **The GADD45B and IL-6 SREs share a requirement for HuR but differ in the breadth of**  
304 **their protective capacity**

305 Depletion of either HuR or NCL impairs the ability of the IL-6 derived SRE to protect  
306 its associated mRNA from degradation by SOX [26,27]. Given that both proteins are also  
307 bound by the G-SRE, we evaluated whether they were similarly important for G-SRE-  
308 mediated escape. We individually depleted each protein from 293T cells using siRNAs  
309 targeting HuR or NCL (or control non-targeting siRNAs), then measured the ability of SOX  
310 to degrade the GFP-GADD45B-3'UTR reporter by RT-qPCR (**Fig. 6A & 6B**). Similar to the IL-  
311 6 SRE, depletion of HuR eliminated the protective capacity of the G-SRE, leading to  
312 degradation of the GFP-GADD45B-3'UTR mRNA in SOX-expressing cells (**Fig. 6A**).  
313 Surprisingly however, depletion of NCL did not impair the protective effect of the G-SRE in  
314 SOX-expressing cells (**Fig. 6B**).

315 Finally, we used the GFP-GADD45B-3'UTR reporter to evaluate whether the G-SRE  
316 conferred protection from cleavage by the panel of viral endonucleases described in Fig. 1.  
317 Using the same experimental set up as was used for the IL-6 derived SRE reporter, we  
318 observed that while the GADD45B 3' UTR protected against SOX and vhs, it was unable to  
319 protect against degradation by muSOX, BGLF5, and PA-X (**Fig. 6C**). Furthermore, it did not  
320 protect against cleavage by the nsp1-activated host endonuclease (**Fig. 6C**). Thus, although  
321 the IL-6 and GADD45B derived nuclease escape elements exhibit a number of similarities,  
322 they are distinct in both their RNP complex requirements and in the breadth of nucleases  
323 they restrict.

324

## 325 **DISCUSSION**

326 Viruses extensively interface with the host gene expression machinery to promote  
327 their own RNA and protein synthesis and to control the cellular response to infection. In



328 this regard, they have proven to be invaluable tools to dissect mechanisms of gene  
329 regulation. Here, we reveal that a ~200 nt sequence present in the 3' UTR of the cellular IL-  
330 6 mRNA functions as a broad-acting, virus-specific endonuclease escape element, and  
331 identify a similar element in the GADD45B 3' UTR. Although these two SREs are not  
332 identical in their protective capacity, they display some sequence and putative structural  
333 similarities and are both functionally dependent on HuR binding. We hypothesize that  
334 these may therefore be representative members of a new type of RNA regulatory element  
335 engaged during viral endonuclease-triggered mRNA decay. Determining whether other  
336 such elements exist in mammalian or viral mRNAs is an important future goal, as is  
337 deciphering conditions under which such elements impact RNA fate in uninfected cells.

338         The IL-6 and GADD45B SREs display relatively limited sequence similarity but have  
339 at least one structurally important stem-loop in common. Thus, RNA structure appears to  
340 be a central component of an SRE and is likely to influence recruitment or arrangement of  
341 proteins involved in escape. This is in line with the fact that RNP assembly can be more  
342 heavily impacted by structural fidelity than primary sequence recognition [59]. We  
343 hypothesize that there is a core set of proteins required for SRE function, such as HuR, but  
344 that individual SREs recruit distinct accessory factors that dictate the conditions or  
345 mechanism by which that SRE protects against nuclease targeting. In this regard, we have  
346 not found significant overlap between known HuR mRNA targets and mRNAs that are not  
347 downregulated by SOX [22]. This is in agreement with the fact that many of the SRE bound  
348 proteins have a breadth of roles in controlling RNA fate beyond conferring nuclease escape  
349 [60-64]. SRE activity may be further impacted by the cellular context and neighboring  
350 regulatory features, particularly in the case of tightly controlled transcripts. The 3' UTR of

351 IL-6, for example, is targeted by several cellular endonucleases including MCPIP1 [65-67],  
352 which has recently been reported to be inhibited during de novo KSHV infection [68]. The  
353 above features underscore the importance of characterizing multiple SREs to parse out  
354 specific protein requirements, but also present challenges for the identification of SREs, as  
355 they cannot be easily predicted. Indeed, it has taken more than a decade from the first  
356 report of IL-6 escaping SOX-induced host shutoff to identify a second SRE-containing mRNA  
357 [29].

358         The observation that the IL-6 SRE in particular acts against diverse viral  
359 endonucleases but does not impact host endonucleases has important implications for  
360 understanding target recognition by these host shutoff factors. First, it suggests that there  
361 are key commonalities to how the viral endonucleases are recruited to mRNAs, and that  
362 these features are distinct from those involved in cellular endonuclease recruitment. The  
363 viral endonucleases recognize translation competent mRNAs, but do not require ongoing  
364 translation for cleavage [10]. While vhs is recruited to a 5' cap proximal location due to its  
365 interaction with a eIF4H, the SOX homologs do not respond to particular location cues on  
366 their target mRNA, and instead recognize a degenerate target motif that can be positioned  
367 anywhere [10,21,69-71]. PA-X has been suggested to bind RNA processing factors in the  
368 nucleus, but how it recognizes cytoplasmic mRNA targets remains unknown [72]. By  
369 contrast, the cellular NMD and no-go decay quality control pathways show a clear  
370 dependence on translation for target recognition, and mRNA cleavage occurs at the site of  
371 the error or translation stall [13]. The observation that neither the IL-6 nor GADD45B SREs  
372 impede these cellular endonucleases indicates that SREs are not inhibitory to translation.  
373 Furthermore, our FISH data do not support mRNA relocalization or sequestration as a

374 driving feature of SRE-mediated escape. We instead hypothesize that the SRE somehow  
375 occludes one or more factors required for recruitment of the viral endonucleases. This  
376 could occur via long-range interactions with mRNA cap-associated proteins, which we  
377 previously showed can take place for the IL-6 SRE [27]. The fact that the GADD45B SRE  
378 restricts against a more limited set of host shutoff factors argues against a single factor  
379 requirement. However, it is possible that there are multiple binding sites on one factor that  
380 are more comprehensively blocked by the IL-6 SRE. Independent of the mechanisms  
381 involved, nuclease escape elements could be developed as tools to broadly inhibit viral  
382 endonucleases without disrupting normal RNA decay pathways.

383         How might viruses benefit from maintaining the expression of IL-6 and GADD45B  
384 during infection? The requirement for IL-6 during KSHV infection is well documented [30-  
385 38], but the role of GADD45B may be more nuanced. While we demonstrated that it  
386 escapes host shutoff during lytic KSHV infection and appears important for viral  
387 reactivation in the iSLK.219 model, GADD45B expression is repressed by viral miRNAs  
388 during latency to avoid its cell cycle arrest and pro-apoptotic functions [73]. However,  
389 GADD45B has a number of additional activities that could be necessary for the viral lytic  
390 cycle. These include promoting DNA demethylation and Retinoblastoma (Rb) inactivation,  
391 processes that are important for a number of DNA viruses, including KSHV [74-79]. If our  
392 hypothesis that there are numerous SREs throughout the transcriptome is correct, it is  
393 likely that individual viruses require only a subset of these host genes for replication. Other  
394 mRNAs may collaterally escape simply because they contain SREs that functionally mimic  
395 those present in the 'required' mRNAs. In this regard, the fact that a given mRNA escapes  
396 degradation by multiple viral endonucleases does not necessarily indicate that expression

397 of that gene is broadly required for infection. Finally, it is important to bear in mind that  
398 the SREs discovered thus far are cellular elements that assemble cellular proteins—and  
399 thus presumably play host-directed roles in the regulation of their associated transcripts. It  
400 may therefore be the case that some SRE-bearing mRNAs function in an antiviral capacity.  
401 Exploring possible virus-host evolutionary interplay for SREs remains an exciting prospect  
402 for future studies.

403

404

## 405 **MATERIALS AND METHODS**

406 **Cells and transfections.** The KSHV-positive B cell line bearing a doxycycline-inducible  
407 version of the major lytic transactivator RTA (TREX-BCBL-1) [55] was maintained in RPMI  
408 medium (Invitrogen) supplemented with 10% fetal bovine serum (FBS; Invitrogen), 200  
409  $\mu$ M L-glutamine (Invitrogen), 100 U/ml penicillin/streptomycin (Invitrogen), and 50  $\mu$ g/ml  
410 hygromycin B (Omega Scientific). Lytic reactivation was induced by treatment with 20  
411 ng/ml 2-O-tetradecanoylphorbol-13-acetate (TPA; Sigma), 1  $\mu$ g/ml doxycycline (BD  
412 Biosciences), and 500 ng/ml ionomycin (Fisher Scientific) for 48h. 293T cells (ATCC) were  
413 grown in DMEM (Invitrogen) supplemented with 10% FBS. The KHSV-infected renal  
414 carcinoma cell line iSLK.219 bearing doxycycline-inducible RTA was grown in DMEM  
415 supplemented with 10% FBS [56]. KSHV lytic reactivation of the iSLK.219 cells was  
416 induced by the addition of 0.2  $\mu$ g/ml doxycycline (BD Biosciences) and 110  $\mu$ g/ml sodium  
417 butyrate for 48 h.

418 For DNA transfections, cells were plated and transfected after 24h when 70%  
419 confluent using linear PEI (polyethylenimine). For small interfering RNA (siRNA)

420 transfections, 293T cells were reverse transfected in 12-well plates by INTERFERin  
421 (Polyplus-Transfection) with 10  $\mu$ M of siRNAs. siRNAs were obtained from IDT as DsiRNA  
422 (siRNA SMG6: hs.Ri.SMG6.13.1; siRNA NCL: hs.Ri.NCL.13.1; siRNA HuR ELAVL1#1:  
423 hs.Ri.ELAVL1.13.2; siRNA ELAVL1#2: hs.Ri.ELAVL1.13.3). 48h following siRNA  
424 transfection, the cells subjected to DNA transfection as indicated.

425

426 **Plasmids.** The GADD45B 5'UTR and CDS were obtained as G-blocks from IDT and cloned  
427 into a pcDNA3.1 plasmid downstream of the GFP coding sequence. GADD45B 3'UTR was  
428 cloned from a pDest-765 plasmid (kindly provided by J. Ziegelbauer) into a pcDNA3.1  
429 plasmid downstream of the GFP coding sequence. The GFP-IL-6 3'UTR, SRE and  $\Delta$ SRE  
430 fusion constructs were described previously [27]. The dsRed2 and dsRed2-PTC reporters  
431 were described elsewhere [10]. The SRE and  $\Delta$ SRE were PCR amplified from the GFP  
432 reporters and cloned downstream of the dsRed2 ORF.

433 Point mutations were introduced with the Quickchange site directed mutagenesis  
434 protocol (Agilent) using the primers described in **Table S3**.

435

436 **FiSH.** Stellaris FiSH probes recognizing MS2 and GAPDH labeled with Quasar 570 Dye  
437 (MS2: SMF-1063-5; GAPDH: SMF-2026-1) were hybridized in 293T cells following  
438 manufacturer's instructions available online at [www.biosearchtech.com/stellarisprotocols](http://www.biosearchtech.com/stellarisprotocols).  
439 Briefly, 293T cells were grown on coverslips and transfected with either an empty vector  
440 control or the MS2-SRE or MS2 $\Delta$ SRE constructs. 24h later, cells were washed, fixed in 4%  
441 formaldehyde and permeabilized in 70% ethanol. Probes (12.5 $\mu$ M) were then hybridized  
442 for >5h at 37°C in Vanadyl ribonucleoside (10mM), formamide (10%), saline sodium citrate

443 (SSC), dextran (10%) and BSA (0.2%). DAPI was added for the last hour to stain cell nuclei.  
444 Coverslips were washed in SSC and mounted in Vectashield mounting medium  
445 (VectorLabs) before visualization by confocal microscopy on a Zeiss LSM 710 AxioObserver  
446 microscope.

447

448 **Comprehensive Analysis of RNA Binding Proteins (ChIRP).** ChIRP was carried out  
449 according to a protocol published previously [58] with minor modifications. Briefly, 293T  
450 cells were transfected with the GFP-GADD45B 3'UTR plasmid and 24h later cells were  
451 crosslinked in 3% formaldehyde for 30 minutes, quenched in 125mM Glycine, washed with  
452 PBS and the pellet was flash frozen. Pellets were then lysed in fresh ChIRP Lysis Buffer  
453 [Tris pH 7.4 50mM, EDTA 10mM, SDS 1%], sonicated, and cell debris was removed by  
454 centrifugation at (14,000rpm for 10 min). Two mL of hybridization buffer was added to  
455 each sample along with 100pmol of the indicated probes (see **Table S3** for sequences).  
456 Hybridization was carried out for 4-12h. After adding streptavidin beads to the samples for  
457 1h, samples were washed and reverse crosslinked at 65°C overnight. For western blotting,  
458 beads were resuspended in 4X loading buffer, boiled for 30 minutes and resolved by SDS-  
459 PAGE. For mass spectrometry, recovered proteins from two independent biological  
460 replicates were gel extracted and subjected to LC-MS/MS at the UC Berkeley Vincent J.  
461 Coates Proteomics/Mass Spectrometry Laboratory.

462

463 **In-line probing.** RNA was synthesized by Dharmacon (SRE-HP #CTM-299208, GADD45-  
464 HP- #CTM-299209). Approximately 1ug of RNA was 5' end-labeled and purified on an 8M  
465 urea gel. Samples were then ethanol precipitated in presence of glycogen, washed in 70%

466 ethanol and dissolved in 20  $\mu$ L of DEPC-treated water. Reactions were carried out with  
467  $\sim$ 1 $\mu$ L of purified RNA ( $\sim$ 100,000cpm). In-line probing was performed following a standard  
468 procedure [57]. Briefly, in-line probing assays were carried for 40h in 2X in-line buffer  
469 [100 mM Tris·HCl, pH 8.3, 40 mM MgCl<sub>2</sub>, 200 mM KCl] and quenched by adding the same  
470 volume of RNA loading Buffer [95% formamide, 10 mM EDTA and 0.025% xylene cyanol].  
471 The no-reaction (NR) treatment, RNase T1 (T1) and partial base hydrolysis (-OH) ladders  
472 were prepared as 20 $\mu$ L reactions and quenched with 20  $\mu$ L RNA loading buffer. Dried gels  
473 were exposed on a phosphorimager screen and scanned using a Typhoon laser-scanning  
474 system (GE Healthcare).

475

476 **RT-qPCR.** Total RNA was harvested using Trizol following the manufacture's protocol.  
477 cDNAs were synthesized from 1  $\mu$ g of total RNA using AMV reverse transcriptase  
478 (Promega), and used directly for quantitative PCR (qPCR) analysis with the DyNAmo  
479 ColorFlash SYBR green qPCR kit (Thermo Scientific). Signals obtained by qPCR were  
480 normalized to 18S.

481

482 **RNA Immunoprecipitation.** Cells were crosslinked in 1% formaldehyde for 10 minutes,  
483 quenched in 125mM glycine and washed in PBS. Cells were then lysed in low-salt lysis  
484 buffer [NaCl 150mM, NP-40 0.5%, Tris pH8 50mM, DTT 1mM, MgCl<sub>2</sub> 3mM containing  
485 protease inhibitor cocktail and RNase inhibitor] and sonicated. After removal of cell debris,  
486 specific antibodies were added as indicated overnight at 4°C. Magnetic G-coupled beads  
487 were added for 1h, washed three times with lysis buffer and twice with high-salt lysis  
488 buffer (low-salt lysis buffer except containing 400mM NaCl). Samples were separated into

489 two fractions. Beads containing the fraction used for western blotting were resuspended in  
490 30 $\mu$ L lysis buffer. Beads containing the fraction used for RNA extraction were resuspended  
491 in Proteinase K buffer (NaCl 100mM, Tris pH 7.4 10mM, EDTA 1mM, SDS 0.5%) containing  
492 1 $\mu$ L of PK (Proteinase K). Samples were incubated overnight at 65°C to reverse  
493 crosslinking. Samples to be analyzed by western blot were then supplemented with 10 $\mu$ L of  
494 4X loading buffer before resolution by SDS-PAGE. RNA samples were resuspend in Trizol  
495 and were processed as described above.

496

497 **Western Blotting.** Lysates were resolved by SDS-PAGE and western blotted with the  
498 following antibodies at 1:1000 in TBST (Tris-buffered saline, 0.1% Tween 20): rabbit anti-  
499 EST1A/SMG6 (Abcam), rabbit anti-NCL (Abcam), rabbit anti-HuR (Millipore), rabbit anti-  
500 actin (Abcam), rabbit anti-IGF2BP1 (Abcam), rabbit anti-YTHDC2 (Abcam), rabbit anti-  
501 hnRNPU (Abcam), rabbit anti-ZC3HAV1 (Abcam), rabbit anti-hnRNPD (Abcam), rabbit anti-  
502 STAU1 (Pierce), mouse anti-NPM1 (Abcam), rabbit anti-GADD45 (Abcam), mouse anti-  
503 GAPDH (Abcam), mouse anti-ORF59 (Adv biotechnologies), or rabbit anti-K8.1 (PRF&L,  
504 inc). Primary antibody incubations were followed by HRP-conjugated goat anti-mouse or  
505 goat anti-rabbit secondary antibodies (Southern Biotechnology, 1:5000).

506

507 **Statistical analysis.** All results are expressed as means  $\pm$  S.E.M. of experiments  
508 independently repeated at least three times. Unpaired Student's t test was used to evaluate  
509 the statistical difference between samples. Significance was evaluated with P values as  
510 follows: \* p<0.1; \*\* p<0.05; \*\*\* p<0.01.

511



512 **ACKNOWLEDGMENTS**

513 We thank members of the Glaunsinger and Coscoy labs for helpful discussions. We also  
514 thank Ming Hammond, Debojit Bose and Carolin Vogt for technical advice on in-line  
515 probing.

516

517 **FUNDING**

518 This research was supported by NIH grants CA160556 and CA136367  
519 (<http://www.nih.gov/> ) and a Burroughs Wellcome Investigator in the Pathogenesis of  
520 Infectious Diseases Award ([http:// www.bwfund.org/grant-programs/infectious-diseases/  
521 investigators-in-pathogenesis-of-infectious-disease](http://www.bwfund.org/grant-programs/infectious-diseases/investigators-in-pathogenesis-of-infectious-disease)) to BAG. B.A.G. is an investigator of the  
522 Howard Hughes Medical Institute. Funding for open access charge: Howard Hughes  
523 Medical Institute and MM is a HHMI Fellow of the Damon Runyon Cancer Research  
524 Foundation (DRG- 2207-14) (<http://www.damonrunyon.org/>). This work used the Vincent  
525 J. Proteomics/Mass Spectrometry Laboratory at UC Berkeley, supported in part by NIH S10  
526 Instrumentation Grant S10RR025622.

527

528

529

530 **REFERENCES**

531

532

- 533 1. Gaglia MM, Covarrubias S, Wong W, Glaunsinger BA. A common strategy for host RNA  
534 degradation by divergent viruses. *J Virol.* 2012;86: 9527–9530.
- 535 2. Rivas HG, Schmaling SK, Gaglia MM. Shutoff of Host Gene Expression in Influenza A  
536 Virus and Herpesviruses: Similar Mechanisms and Common Themes. *Viruses.*  
537 2016;8: 102.
- 538 3. Jagger BW, Wise HM, Kash JC, Walters K-A, Wills NM, Xiao Y-L, et al. An overlapping  
539 protein-coding region in influenza A virus segment 3 modulates the host response.  
540 *Science.* 2012;337: 199–204.
- 541 4. Kwong AD, Frenkel N. Herpes simplex virus-infected cells contain a function(s) that  
542 destabilizes both host and viral mRNAs. *Proc Natl Acad Sci USA.* 1987;84: 1926–  
543 1930.
- 544 5. Kamitani W, Huang C, Narayanan K, Lokugamage KG, Makino S. A two-pronged  
545 strategy to suppress host protein synthesis by SARS coronavirus Nsp1 protein. *Nat*  
546 *Struct Mol Biol.* 2009;16: 1134–1140.
- 547 6. Parrish S, Moss B. Characterization of a vaccinia virus mutant with a deletion of the  
548 D10R gene encoding a putative negative regulator of gene expression. *J Virol.*  
549 2006;80: 553–561.
- 550 7. Parrish S, Moss B. Characterization of a second vaccinia virus mRNA-decapping  
551 enzyme conserved in poxviruses. *J Virol.* 2007;81: 12973–12978.
- 552 8. Parrish S, Resch W, Moss B. Vaccinia virus D10 protein has mRNA decapping activity,  
553 providing a mechanism for control of host and viral gene expression. *Proc Natl Acad*  
554 *Sci USA.* 2007;104: 2139–2144.
- 555 9. Elgadi MM, Hayes CE, Smiley JR. The herpes simplex virus vhs protein induces  
556 endoribonucleolytic cleavage of target RNAs in cell extracts. *J Virol.* 1999;73: 7153–  
557 7164.
- 558 10. Covarrubias S, Gaglia MM, Kumar GR, Wong W, Jackson AO, Glaunsinger BA.  
559 Coordinated destruction of cellular messages in translation complexes by the  
560 gammaherpesvirus host shutoff factor and the mammalian exonuclease Xrn1. *PLoS*  
561 *Pathog.* 2011 7(10): e1002339
- 562 11. Burgess HM, Mohr I. Cellular 5′-3′ mRNA exonuclease Xrn1 controls double-  
563 stranded RNA accumulation and anti-viral responses. *Cell Host Microbe.* 2015;17:

- 564 332–344.
- 565 12. Schoenberg DR, Maquat LE. Regulation of cytoplasmic mRNA decay. *Nat Rev Genet.*  
566 2012;13: 246–259.
- 567 13. Mühlemann O, Lykke-Andersen J. How and where are nonsense mRNAs degraded in  
568 mammalian cells? *RNA Biol.* 2010;7: 28–32.
- 569 14. Doma MK, Parker R. Endonucleolytic cleavage of eukaryotic mRNAs with stalls in  
570 translation elongation. *Nature.* 2006;440: 561–564.
- 571 15. Harigaya Y, Parker R. No-go decay: a quality control mechanism for RNA in  
572 translation. *Wiley Interdiscip Rev RNA.* 2010;1: 132–141.
- 573 16. Covarrubias S, Richner JM, Clyde K, Lee YJ, Glaunsinger BA. Host shutoff is a  
574 conserved phenotype of gammaherpesvirus infection and is orchestrated exclusively  
575 from the cytoplasm. *J Virol.* 2009;83: 9554–9566.
- 576 17. Rowe M, Glaunsinger B, van Leeuwen D, Zuo J, Sweetman D, Ganem D, et al. Host  
577 shutoff during productive Epstein-Barr virus infection is mediated by BGLF5 and  
578 may contribute to immune evasion. *Proc Natl Acad Sci USA.* 2007;104: 3366–3371.
- 579 18. Glaunsinger B, Ganem D. Lytic KSHV infection inhibits host gene expression by  
580 accelerating global mRNA turnover. *Mol Cell.* 2004;13: 713–723.
- 581 19. Abernathy E, Clyde K, Yeasmin R, Krug LT, Burlingame A, Coscoy L, et al.  
582 Gammaherpesviral gene expression and virion composition are broadly controlled  
583 by accelerated mRNA degradation. *PLoS Pathog.* 2014;10: e1003882.
- 584 20. Richner JM, Clyde K, Pezda AC, Cheng BYH, Wang T, Kumar GR, et al. Global mRNA  
585 degradation during lytic gammaherpesvirus infection contributes to establishment of  
586 viral latency. *PLoS Pathog.* 2011;7: e1002150.
- 587 21. Gaglia MM, Rycroft CH, Glaunsinger BA. Transcriptome-Wide Cleavage Site Mapping  
588 on Cellular mRNAs Reveals Features Underlying Sequence-Specific Cleavage by the  
589 Viral Ribonuclease SOX. *PLoS Pathog.* 2015;11: e1005305.
- 590 22. Clyde K, Glaunsinger BA. Deep sequencing reveals direct targets of  
591 gammaherpesvirus-induced mRNA decay and suggests that multiple mechanisms  
592 govern cellular transcript escape. *PLoS ONE.* 2011;6: e19655.
- 593 23. Chandriani S, Ganem D. Host transcript accumulation during lytic KSHV infection  
594 reveals several classes of host responses. *PLoS ONE.* 2007;2: e811.
- 595 24. Clyde K, Glaunsinger BA. Getting the message direct manipulation of host mRNA  
596 accumulation during gammaherpesvirus lytic infection. *Adv Virus Res.* 2010;78: 1–  
597 42.

- 598 25. Lee YJ, Glaunsinger BA. Aberrant herpesvirus-induced polyadenylation correlates  
599 with cellular messenger RNA destruction. *PLoS Biol.* 2009;7: e1000107.
- 600 26. Hutin S, Lee Y, Glaunsinger BA. An RNA element in human interleukin 6 confers  
601 escape from degradation by the gammaherpesvirus SOX protein. *J Virol.* 2013;87:  
602 4672–4682.
- 603 27. Muller M, Hutin S, Marigold O, Li KH, Burlingame A, Glaunsinger BA. A  
604 ribonucleoprotein complex protects the interleukin-6 mRNA from degradation by  
605 distinct herpesviral endonucleases. *PLoS Pathog.* 2015;11: e1004899.
- 606 28. Abernathy E, Gilbertson S, Alla R, Glaunsinger B. Viral Nucleases Induce an mRNA  
607 Degradation-Transcription Feedback Loop in Mammalian Cells. *Cell Host Microbe.*  
608 2015;18: 243–253.
- 609 29. Glaunsinger B, Ganem D. Highly selective escape from KSHV-mediated host mRNA  
610 shutoff and its implications for viral pathogenesis. *J Exp Med.* 2004;200: 391–398.
- 611 30. Sin S-H, Roy D, Wang L, Staudt MR, Fakhari FD, Patel DD, et al. Rapamycin is  
612 efficacious against primary effusion lymphoma (PEL) cell lines in vivo by inhibiting  
613 autocrine signaling. *Blood.* 2007;109: 2165–2173.
- 614 31. Miles SA, Rezai AR, Salazar-González JF, Vander Meyden M, Stevens RH, Logan DM, et  
615 al. AIDS Kaposi sarcoma-derived cells produce and respond to interleukin 6. *Proc*  
616 *Natl Acad Sci USA.* 1990;87: 4068–4072.
- 617 32. Screpanti I, Musiani P, Bellavia D, Cappelletti M, Aiello FB, Maroder M, et al.  
618 Inactivation of the IL-6 gene prevents development of multicentric Castleman's  
619 disease in C/EBP beta-deficient mice. *J Exp Med.* 1996;184: 1561–1566.
- 620 33. Leger-Ravet MB, Peuchmaur M, Devergne O, Audouin J, Raphael M, Van Damme J, et  
621 al. Interleukin-6 gene expression in Castleman's disease. *Blood.* 1991;78: 2923–2930.
- 622 34. Xie J, Pan H, Yoo S, Gao S-J. Kaposi's sarcoma-associated herpesvirus induction of AP-  
623 1 and interleukin 6 during primary infection mediated by multiple mitogen-activated  
624 protein kinase pathways. *J Virol.* 2005;79: 15027–15037.
- 625 35. An J, Sun Y, Sun R, Rettig MB. Kaposi's sarcoma-associated herpesvirus encoded  
626 vFLIP induces cellular IL-6 expression: the role of the NF-kappaB and JNK/AP1  
627 pathways. *Oncogene.* 2003;22: 3371–3385.
- 628 36. Santarelli R, Gonnella R, Di Giovenale G, Cuomo L, Capobianchi A, Granato M, et al.  
629 STAT3 activation by KSHV correlates with IL-10, IL-6 and IL-23 release and an  
630 autophagic block in dendritic cells. *Sci Rep.* 2014;4: 4241.
- 631 37. Deng H, Chu JT, Rettig MB, Martinez-Maza O, Sun R. Rta of the human herpesvirus  
632 8/Kaposi sarcoma-associated herpesvirus up-regulates human interleukin-6 gene

- 633 expression. *Blood*. 2002;100: 1919–1921.
- 634 38. McCormick C, Ganem D. The kaposin B protein of KSHV activates the p38/MK2  
635 pathway and stabilizes cytokine mRNAs. *Science*. 2005;307: 739–741.
- 636 39. Oishi K, Yamayoshi S, Kawaoka Y. Mapping of a Region of the PA-X Protein of  
637 Influenza A Virus That Is Important for Its Shutoff Activity. *J Virol*. 2015;89: 8661–  
638 8665.
- 639 40. Smiley JR, Elgadi MM, Saffran HA. Herpes simplex virus vhs protein. *Meth Enzymol*.  
640 2001;342: 440–451.
- 641 41. Everly DN, Feng P, Mian IS, Read GS. mRNA degradation by the virion host shutoff  
642 (Vhs) protein of herpes simplex virus: genetic and biochemical evidence that Vhs is a  
643 nuclease. *J Virol*. 2002;76: 8560–8571.
- 644 42. Aizer A, Kalo A, Kafri P, Shraga A, Ben-Yishay R, Jacob A, et al. Quantifying mRNA  
645 targeting to P-bodies in living human cells reveals their dual role in mRNA decay and  
646 storage. *J Cell Sci*. 2014;127: 4443–4456.
- 647 43. Abernathy E, Glaunsinger B. Emerging roles for RNA degradation in viral replication  
648 and antiviral defense. *Virology*. 2015;479-480: 600–608.
- 649 44. Isken O, Maquat LE. Quality control of eukaryotic mRNA: safeguarding cells from  
650 abnormal mRNA function. *Genes Dev*. 2007;21: 1833–1856.
- 651 45. Schoenberg DR. Mechanisms of endonuclease-mediated mRNA decay. *Wiley*  
652 *Interdiscip Rev RNA*. 2011;2: 582–600.
- 653 46. Eberle AB, Lykke-Andersen S, Mühlemann O, Jensen TH. SMG6 promotes  
654 endonucleolytic cleavage of nonsense mRNA in human cells. *Nat Struct Mol Biol*.  
655 2009;16: 49–55.
- 656 47. Narayanan K, Ramirez SI, Lokugamage KG, Makino S. Coronavirus nonstructural  
657 protein 1: Common and distinct functions in the regulation of host and viral gene  
658 expression. *Virus Res*. 2015;202: 89–100.
- 659 48. Huang C, Lokugamage KG, Rozovics JM, Narayanan K, Semler BL, Makino S. SARS  
660 coronavirus nsp1 protein induces template-dependent endonucleolytic cleavage of  
661 mRNAs: viral mRNAs are resistant to nsp1-induced RNA cleavage. *PLoS Pathog*.  
662 2011;7: e1002433.
- 663 49. Zhang Y, Bhatia D, Xia H, Castranova V, Shi X, Chen F. Nucleolin links to arsenic-  
664 induced stabilization of GADD45alpha mRNA. *Nucleic Acids Res*. 2006;34: 485–495.
- 665 50. Zhang D, Liang Y, Xie Q, Gao G, Wei J, Huang H, et al. A novel post-translational  
666 modification of nucleolin, SUMOylation at Lys-294, mediates arsenite-induced cell

- 667 death by regulating gadd45 $\alpha$  mRNA stability. *J Biol Chem.* 2015;290: 4784–4800.
- 668 51. Zheng X, Zhang Y, Chen Y-Q, Castranova V, Shi X, Chen F. Inhibition of NF-kappaB  
669 stabilizes gadd45alpha mRNA. *Biochem Biophys Res Commun.* 2005;329: 95–99.
- 670 52. Esclatine A, Taddeo B, Evans L, Roizman B. The herpes simplex virus 1 UL41 gene-  
671 dependent destabilization of cellular RNAs is selective and may be sequence-specific.  
672 *Proc Natl Acad Sci USA.* 2004;101: 3603–3608.
- 673 53. Barzilai A, Zivony-Elbom I, Sarid R, Noah E, Frenkel N. The herpes simplex virus type  
674 1 vhs-UL41 gene secures viral replication by temporarily evading apoptotic cellular  
675 response to infection: Vhs-UL41 activity might require interactions with elements of  
676 cellular mRNA degradation machinery. *J Virol.* 2006;80: 505–513.
- 677 54. Khodarev NN, Advani SJ, Gupta N, Roizman B, Weichselbaum RR. Accumulation of  
678 specific RNAs encoding transcriptional factors and stress response proteins against a  
679 background of severe depletion of cellular RNAs in cells infected with herpes simplex  
680 virus 1. *Proc Natl Acad Sci USA.* 1999;96: 12062–12067.
- 681 55. Nakamura H, Lu M, Gwack Y, Souvlis J, Zeichner SL, Jung JU. Global changes in  
682 Kaposi's sarcoma-associated virus gene expression patterns following expression of  
683 a tetracycline-inducible Rta transactivator. *J Virol.* 2003;77: 4205–4220.
- 684 56. Myoung J, Ganem D. Generation of a doxycycline-inducible KSHV producer cell line of  
685 endothelial origin: maintenance of tight latency with efficient reactivation upon  
686 induction. *J Virol Methods.* 2011;174: 12–21.
- 687 57. Regulski EE, Breaker RR. In-line probing analysis of riboswitches. *Methods Mol Biol.*  
688 2008;419: 53–67.
- 689 58. Chu C, Zhang QC, da Rocha ST, Flynn RA, Bharadwaj M, Calabrese JM, et al. Systematic  
690 discovery of Xist RNA binding proteins. *Cell.* 2015;161: 404–416.
- 691 59. Bevilacqua PC, Ritchey LE, Su Z, Assmann SM. Genome-Wide Analysis of RNA  
692 Secondary Structure. *Annu Rev Genet.* 2016;50: 235–266.
- 693 60. Dean JLE, Sully G, Clark AR, Saklatvala J. The involvement of AU-rich element-binding  
694 proteins in p38 mitogen-activated protein kinase pathway-mediated mRNA  
695 stabilisation. *Cell Signal.* 2004;16: 1113–1121.
- 696 61. Abdelmohsen K, Gorospe M. RNA-binding protein nucleolin in disease. *RNA Biol.*  
697 2012;9: 799–808.
- 698 62. Bell JL, Wächter K, Mühleck B, Pazaitis N, Köhn M, Lederer M, et al. Insulin-like  
699 growth factor 2 mRNA-binding proteins (IGF2BPs): post-transcriptional drivers of  
700 cancer progression? *Cell Mol Life Sci.* 2013;70: 2657–2675.



- 701 63. White EJJ, Brewer G, Wilson GM. Post-transcriptional control of gene expression by  
702 AUF1: mechanisms, physiological targets, and regulation. *Biochim Biophys Acta*.  
703 2013;1829: 680–688.
- 704 64. Park E, Maquat LE. Staufen-mediated mRNA decay. *Wiley Interdiscip Rev RNA*.  
705 2013;4: 423–435.
- 706 65. Matsushita K, Takeuchi O, Standley DM, Kumagai Y, Kawagoe T, Miyake T, et al.  
707 Zc3h12a is an RNase essential for controlling immune responses by regulating mRNA  
708 decay. *Nature*. 2009;458: 1185–1190.
- 709 66. Paschoud S, Dogar AM, Kuntz C, Grisoni-Neupert B, Richman L, Kühn LC.  
710 Destabilization of interleukin-6 mRNA requires a putative RNA stem-loop structure,  
711 an AU-rich element, and the RNA-binding protein AUF1. *Mol Cell Biol*. 2006;26:  
712 8228–8241.
- 713 67. Mino T, Murakawa Y, Fukao A, Vandenbon A, Wessels H-H, Ori D, et al. Regnase-1 and  
714 Roquin Regulate a Common Element in Inflammatory mRNAs by Spatiotemporally  
715 Distinct Mechanisms. *Cell*. 2015;161: 1058–1073.
- 716 68. Happel C, Ramalingam D, Ziegelbauer JM. Virus-Mediated Alterations in miRNA  
717 Factors and Degradation of Viral miRNAs by MCP1P1. *PLoS Biol*. 2016;14: e2000998.
- 718 69. Feng P, Everly DN, Read GS. mRNA decay during herpes simplex virus (HSV)  
719 infections: protein-protein interactions involving the HSV virion host shutoff protein  
720 and translation factors eIF4H and eIF4A. *J Virol*. 2005;79: 9651–9664.
- 721 70. Page HG, Read GS. The virion host shutoff endonuclease (UL41) of herpes simplex  
722 virus interacts with the cellular cap-binding complex eIF4F. *J Virol*. 2010;84: 6886–  
723 6890.
- 724 71. Feng P, Everly DN, Read GS. mRNA decay during herpesvirus infections: interaction  
725 between a putative viral nuclease and a cellular translation factor. *J Virol*. 2001;75:  
726 10272–10280.
- 727 72. Khaperskyy DA, Schmaling S, Larkins-Ford J, McCormick C, Gaglia MM. Selective  
728 Degradation of Host RNA Polymerase II Transcripts by Influenza A Virus PA-X Host  
729 Shutoff Protein. *PLoS Pathog*. 2016;12: e1005427.
- 730 73. Liu X, Happel C, Ziegelbauer JM. Kaposi's Sarcoma-Associated Herpesvirus  
731 MicroRNAs Target GADD45B To Protect Infected Cells from Cell Cycle Arrest and  
732 Apoptosis. *J Virol*. 2017;91: e02045–16.
- 733 74. Cho HJ, Park S-M, Hwang EM, Baek KE, Kim I-K, Nam I-K, et al. Gadd45b mediates  
734 Fas-induced apoptosis by enhancing the interaction between p38 and  
735 retinoblastoma tumor suppressor. *J Biol Chem*. 2010;285: 25500–25505.

- 736 75. Hume AJ, Kalejta RF. Regulation of the retinoblastoma proteins by the human  
737 herpesviruses. *Cell Div.* 2009;4: 1.
- 738 76. Godden-Kent D, Talbot SJ, Boshoff C, Chang Y, Moore P, Weiss RA, et al. The cyclin  
739 encoded by Kaposi's sarcoma-associated herpesvirus stimulates cdk6 to  
740 phosphorylate the retinoblastoma protein and histone H1. *J Virol.* 1997;71: 4193–  
741 4198.
- 742 77. Chang Y, Moore PS, Talbot SJ, Boshoff CH, Zarkowska T, Godden-Kent, et al. Cyclin  
743 encoded by KS herpesvirus. *Nature.* 1996;382: 410–410.
- 744 78. Ma DK, Guo JU, Ming G-L, Song H. DNA excision repair proteins and Gadd45 as  
745 molecular players for active DNA demethylation. *Cell Cycle.* 2009;8: 1526–1531.
- 746 79. Purushothaman P, Uppal T, Verma SC. Molecular biology of KSHV lytic reactivation.  
747 *Viruses.* 2015;7: 116–153.

748



749 **FIGURE LEGENDS**

750 **Figure 1: The IL-6-SRE broadly protects against multiple viral endonucleases. (A)**  
751 293T cells were transfected with empty vector (mock) or a plasmid expressing the  
752 indicated endonucleases along with a GFP reporter. After 24 h, total RNA was harvested  
753 and subjected RT-qPCR to measure GFP mRNA levels. Graphs here and afterwards display  
754 individual replicates as dots, together with the mean values ( $\pm$ SEM). Statistical significance  
755 was determined by the Student t test (\*  $p < 0.1$ ; \*\*  $p < 0.05$ ; \*\*\*  $p < 0.01$ ). **(B)** 293T cells were  
756 co-transfected with the indicated endonuclease-expressing plasmid expressing together  
757 with a GFP-SRE or GFP- $\Delta$ SRE reporter. After 24 h, total RNA was harvested and subjected  
758 RT-qPCR to measure GFP mRNA levels. **(C)** Top: diagram showing the structure of the  
759 reporter mRNA containing MS2 repeats upstream of the SRE or  $\Delta$ SRE fragment of the IL-6  
760 3'UTR. Red lines denote the region detected by the MS2 probe. Bottom: 293T cells were  
761 transfected with the indicated MS2 reporters. 24h later, cells were fixed and processed for  
762 RNA FISH staining. Signals from the MS2 probes (red) and DAPI stained nuclei (blue) were  
763 detected by confocal microscopy.

764  
765 **Figure 2: The IL-6-SRE does not protect against cellular endonucleases. (A)** 293T cells  
766 were transfected with the indicated dsRed2 reporters. After 24 h, total RNA was harvested  
767 and subjected RT-qPCR to measure dsRed mRNA levels. **(B)** 293T cells were treated with  
768 siRNAs targeting Smg6 or control non-targeting siRNAs. 48h later, cells were transfected  
769 with the indicated dsRed reporters. After 24h, total RNA was harvested and subjected RT-  
770 qPCR to measure dsRed mRNA levels (*left*). The efficiency of SMG6 knockdown was  
771 measured by western blotting, with actin serving as a loading control (*right*). **(C)** 293T cells  
772 were transfected with the indicated dsRed2 reporters. After 24 h, total RNA was harvested  
773 and subjected to RT-qPCR to measure dsRed mRNA levels. **(D)** 293T cells were transfected  
774 with an empty vector (mock) or a plasmid expressing SCoV nsp1 along with the indicated  
775 GFP reporters. After 24 h, total RNA was harvested and subjected RT-qPCR to measure GFP  
776 mRNA levels.

777  
778 **Figure 3: GADD45B mRNA is protected against SOX degradation. (A, B)** Total RNA was  
779 extracted from unreactivated or reactivated KSHV-positive TREX-BCBL-1 (A) cells or  
780 iSLK.219 cells (B) and subjected to RT-qPCR to measure endogenous levels of the  
781 GADD45B or GAPDH transcript. **(C)** 293T cells were transfected with an empty vector or a  
782 plasmid expressing SOX or vhs. After 24 h, total RNA was harvested and subjected to RT-  
783 qPCR to measure endogenous levels of GADD45B or GAPDH transcripts. **(D)** Diagram of the  
784 reporter constructs where fragments of GADD45B transcript were fused to GFP. **(E)** 293T  
785 cells were transfected with the indicated GFP-GADD45B fusion constructs in the presence  
786 or absence of a plasmid expressing SOX. After 24 h, total RNA was harvested and subjected  
787 to RT-qPCR to measure GFP levels.

788  
789 **Figure 4: The SREs contain a long hairpin required for protection against SOX. (A)**  
790 293T cells were transfected with the indicated GFP reporter along with a control empty  
791 vector (mock) or a plasmid expressing SOX. After 24 h, total RNA was harvested and  
792 subjected to RT-qPCR to measure GFP mRNA levels. **(B)** Diagram of the structure  
793 prediction obtained with RNAfold for IL-6 and GADD45B SREs. The color scale represents

794 the confidence score of the structure as calculated by RNAfold, with red representing the  
795 highest confidence. Asterisks denote the location of mutations that were introduced in the  
796 structure for the following assays. The insets are RNAfold predictions of the stem loops of  
797 interest in isolation. **(C)** 293T cells were transfected with the indicated GFP reporters  
798 containing mutations within IL-6 SRE at the residues marked by a \* in (B) along with a  
799 control empty vector (mock) or a plasmid expressing SOX. After 24 h, total RNA was  
800 harvested and subjected RT-qPCR to measure GFP mRNA levels. **(D)** 293T cells were  
801 transfected with the indicated GFP reporters mutated within G- SRE at the residues marked  
802 by a \* in (B) along with a control empty vector (mock) or a plasmid expressing SOX. After  
803 24 h, total RNA was harvested and subjected to RT-qPCR to measure GFP mRNA levels.

804 **Figure 5: The IL-6 and GADD45B SRE bind a partially overlapping set of cellular**  
805 **proteins. (A)** Diagram outlining the ChIRP assay. **(B)** Cytoscape network showing the  
806 proteins reported to interact with the IL-6 SRE from a previous screen [27] (gray nodes)  
807 overlaid with the set of proteins that were also recovered by ChIRP-MS for the IL-6 and  
808 GADD45B 3' UTRs (purple nodes) **(C)** 293T were transfected with the GFP-GADD45B  
809 3'UTR reporter, then 24h later they were subjected to ChIRP analysis and protein samples  
810 were western blotted. **(D)** Crosslinked lysates of 293T cells were subjected to RNA  
811 immunoprecipitation (RIP) with control IgG, anti-NCL, or anti-HuR antibodies and the level  
812 of co-purifying endogenous GADD45B mRNA was quantified by RT-qPCR. Bars represent  
813 the fold enrichment over the mock IP. **(E)** 293T cells were transfected with either the GFP-  
814 GADD45B 5'UTR, GFP-GADD45B 3'UTR, or GFP-GADD45B 3'UTR\_GG reporter for 24 h.  
815 Lysates were then subjected to RIP as described in (C). Bars represent the fold enrichment  
816 over mock IP.

817  
818 **Figure 6: The GADD45B SRE function requires HuR, but is only protective against**  
819 **SOX and vhs. (A, B)** 293T cells were treated with siRNAs targeting HuR (A) or NCL (B) or  
820 control non targeting siRNAs. 48h later, cells were transfected with the GFP-GADD45B-  
821 3'UTR reporter along with a control empty vector or a plasmid expressing SOX. After 24 h,  
822 total RNA was harvested and subjected to RT-qPCR to measure GFP mRNA levels. Protein  
823 levels of HuR and NCL after siRNA-mediated depletion are shown under the bar graphs  
824 (~30% and 45% of total protein left respectively) **(C)** 293T cells were transfected with the  
825 GFP-GADD45B-3'UTR reporter along with a control empty vector or a plasmid expressing  
826 the indicated viral endonucleases. After 24 h, total RNA was harvested and subjected to RT-  
827 qPCR to measure GFP mRNA levels.

828  
829  
830

## 831 SUPPORTING INFORMATION

832

833 **Figure S1:** 293T cells were transfected with the indicated MS2 luciferase reporter  
834 containing or lacking the IL-6 SRE +/- a KSHV SOX expression plasmid. After 24 h, total  
835 RNA was harvested and subjected RT-qPCR to measure reporter mRNA levels.

836

837 **Figure S2: (A)** iSLK.219 cells were treated with siRNAs targeting GADD45B (or control  
838 non-target siRNAs) for 48h. Cells were then reactivated with doxycycline and sodium

839 butyrate for 24 or 48h, fixed, and reactivation efficiency was monitored by expression of  
840 red fluorescent protein, which is expressed from the viral genome under the control of the  
841 lytic PAN promoter. **(B)** After siRNA treatment and reactivation as described in A, cell  
842 lysates were subjected to western blotting to measure protein levels of GADD45B, the  
843 KSHV proteins K8.1 and ORF59, and GAPDH (as a loading control).

844

845 **Figure S3:** Clustal W alignment of IL-6 SRE and GADD45B 3'UTR.

846

847 **Figure S4:** In-line probing of the IL-6 (left) and GADD45B (right) predicted stem-loop. <sup>32</sup>P-  
848 labeled RNA (NR, no reaction) and products resulting from partial digestion with nuclease  
849 T1 (T1; cuts after G residues), partial digestion with alkali (-OH), and spontaneous cleavage  
850 during a 24h incubation are shown. Product bands corresponding to G residues (generated  
851 by T1 digestion) are labeled with black arrows. Predicted paired or unpaired residues are  
852 marked on the right of each gel and are shown on the RNA fold diagrams.

853

854 **Figure S5:** Network representation of the full set of proteins identified by ChIRP-MS for  
855 either the IL-6 or GADD45B 3'UTR. Purple nodes represent proteins that were previously  
856 identified using an *in vitro* pulldown/MS-based assay [27].

857

858

859 **Table S1:** List of proteins identified by ChIRP-MS. Proteins in bold were in common  
860 between the IL-6 and GADD45B 3' UTR datasets. Background proteins found in the control  
861 ChIRP-MS runs with probes were filtered out together with common contaminants.

862

863 **Table S2:** List of proteins identified by ChIRP-MS that are in common with previously  
864 identified SRE-binding proteins [27].

865

866 **Table S3:** List of primers used in this study

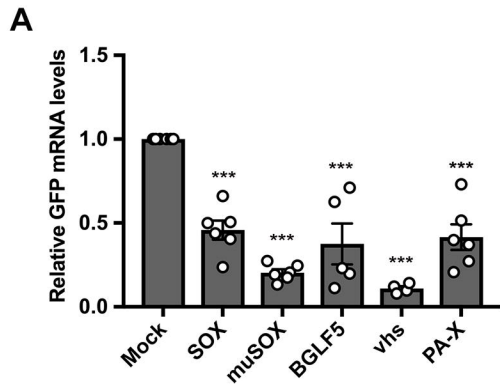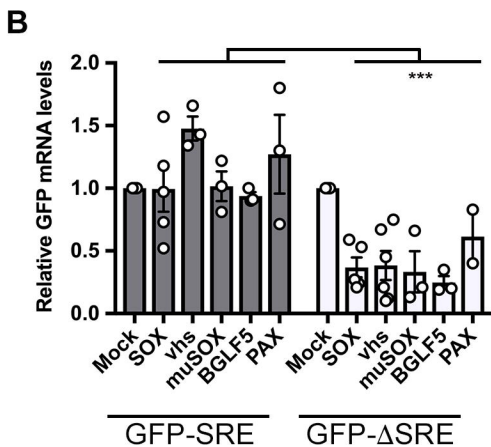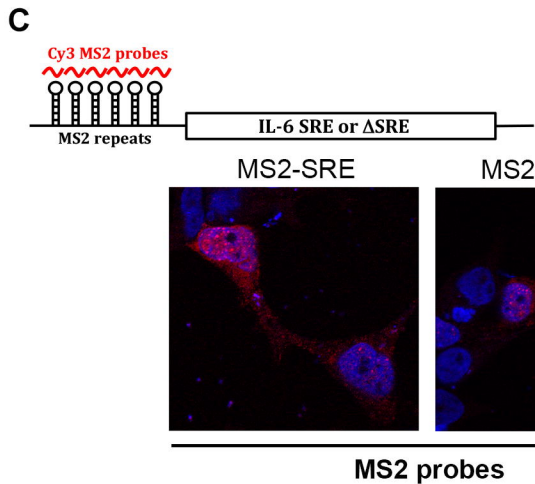

**A**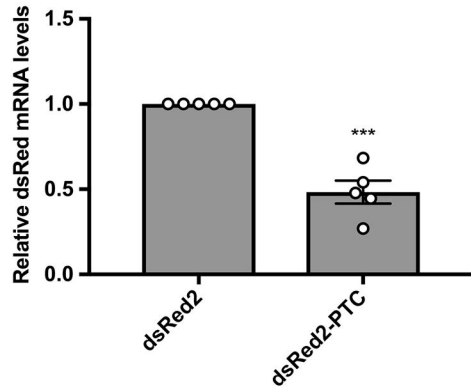**B**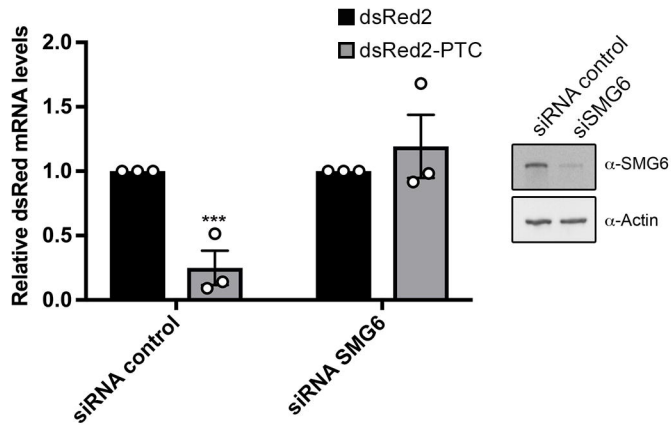**C**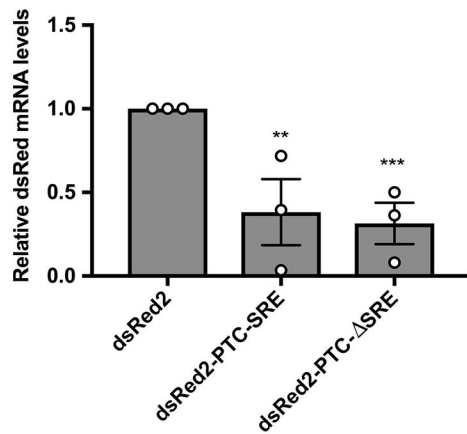**D**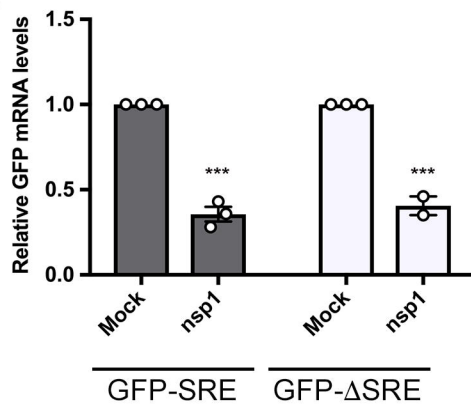

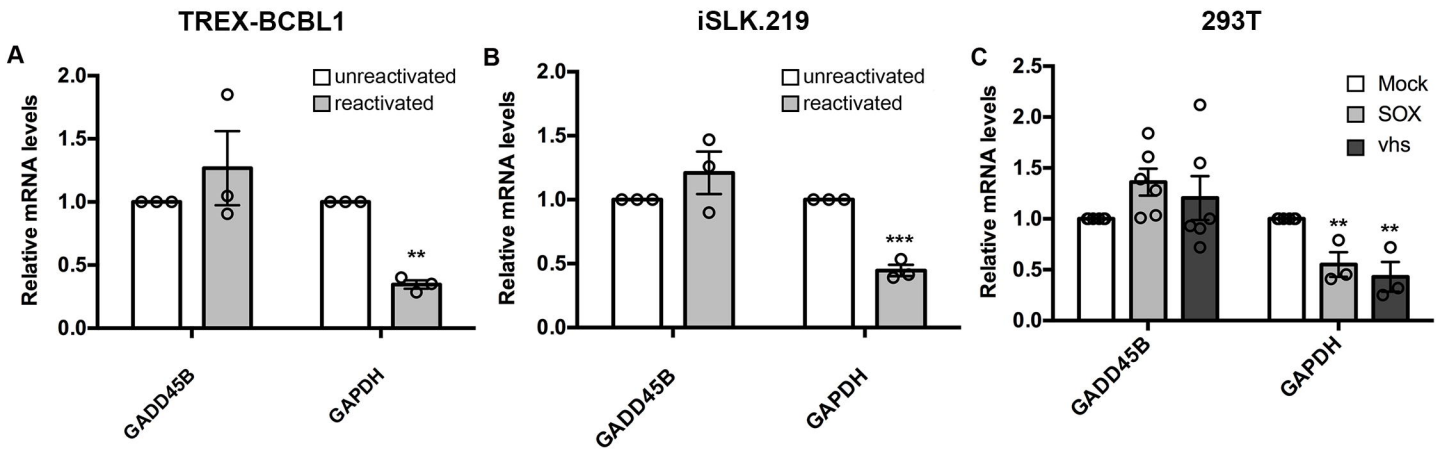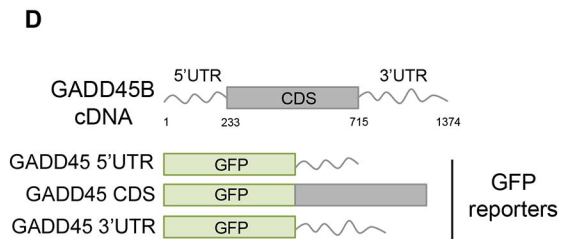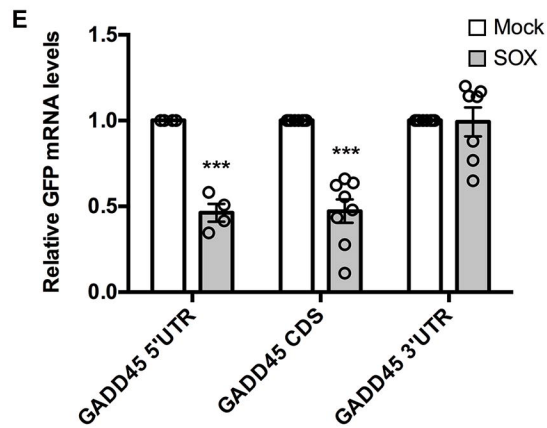

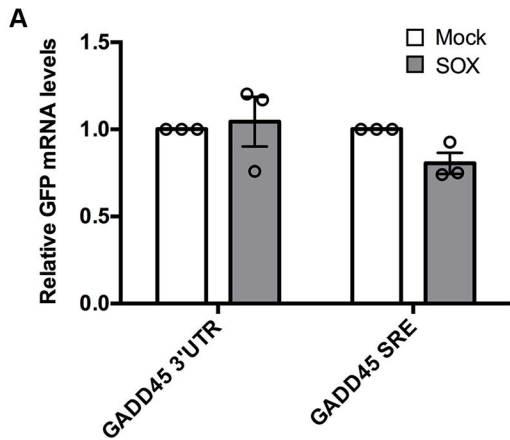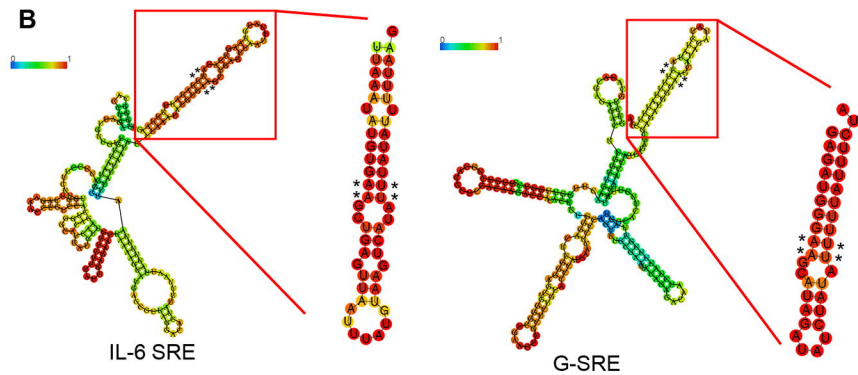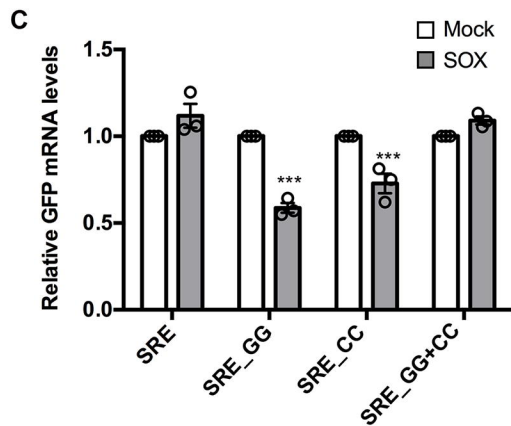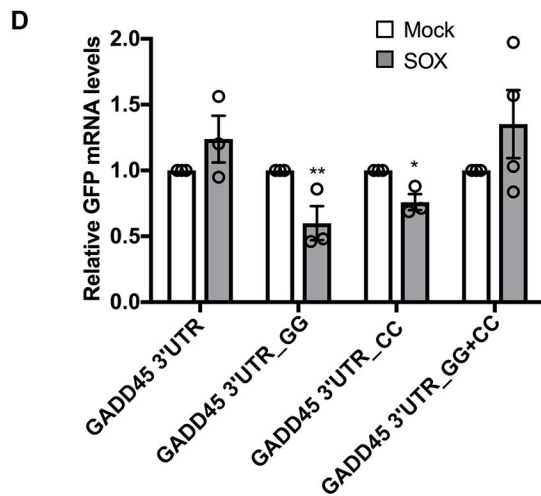



**A**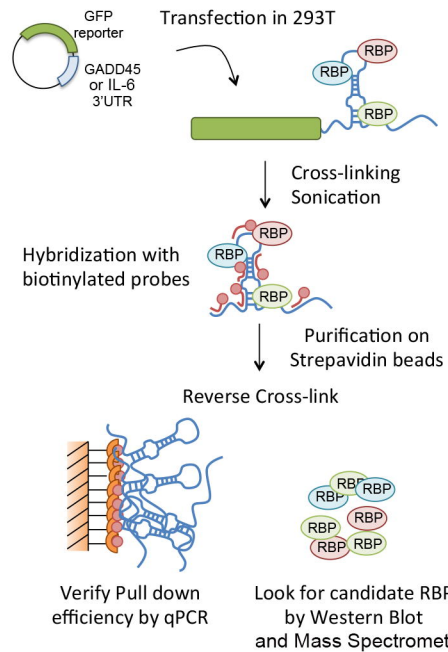**B**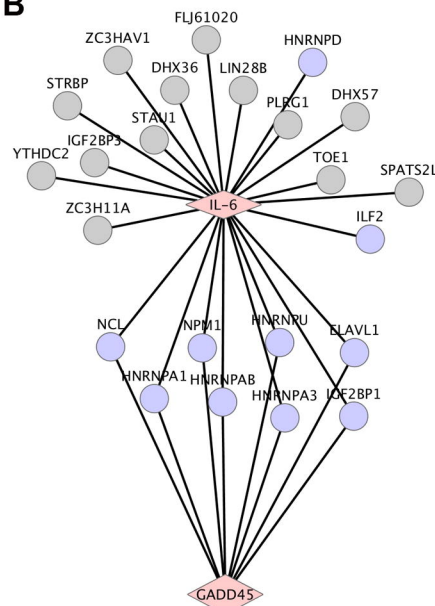**C**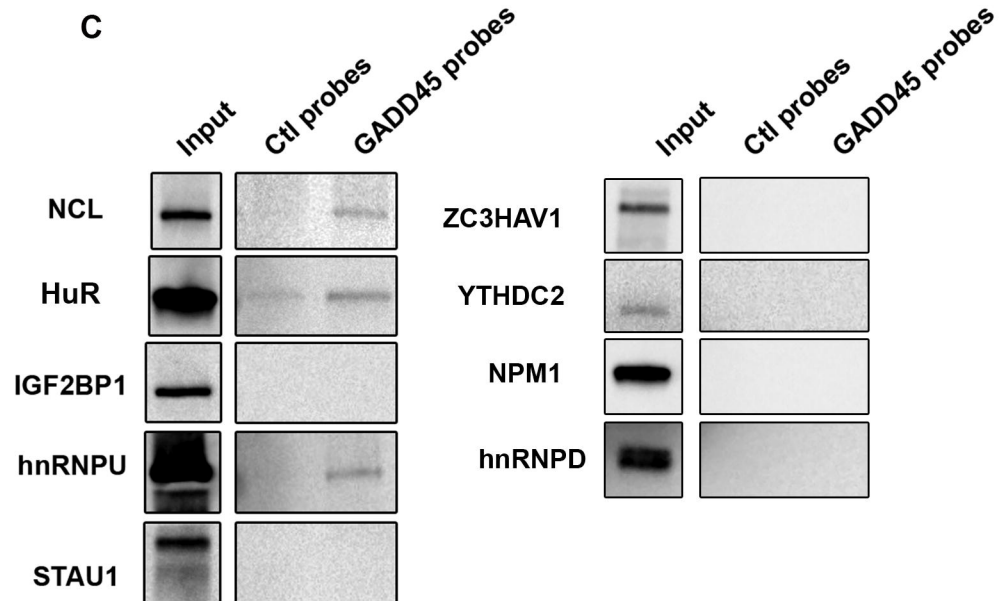**D**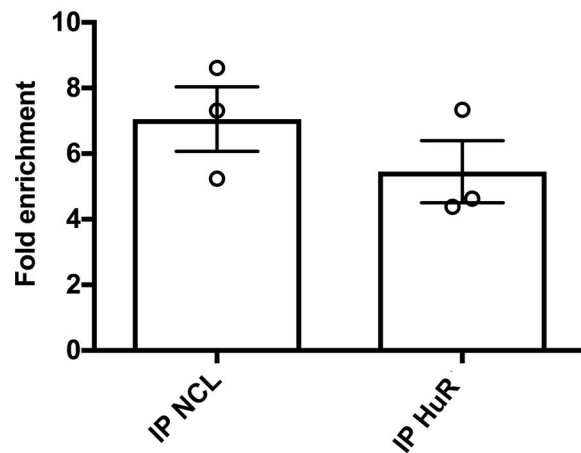**E**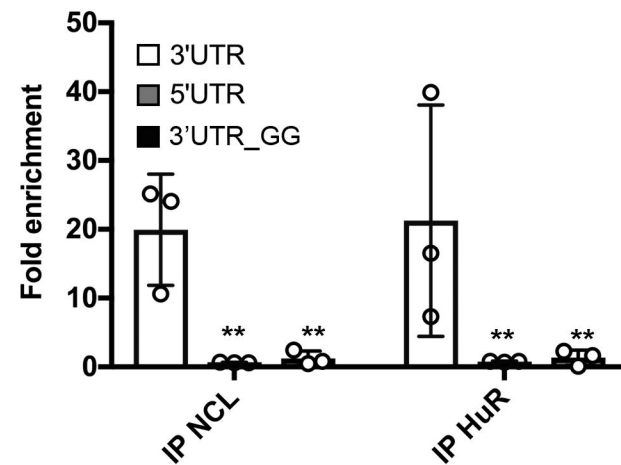



**A**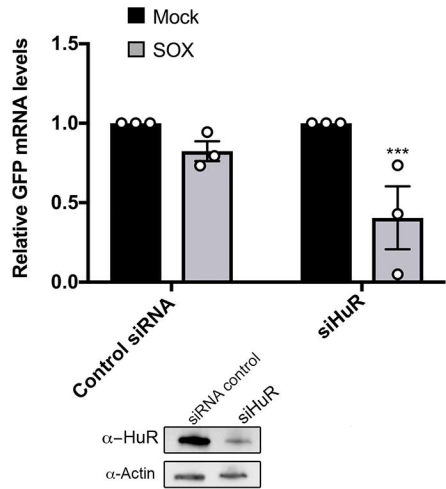**B**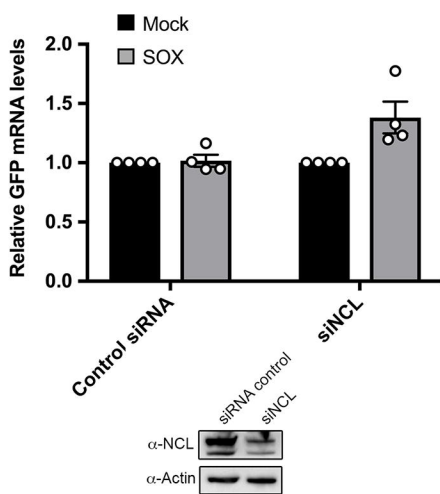**C**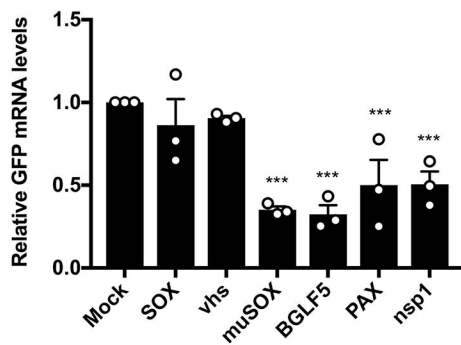

Source: http://www.biorxiv.org/content/10.1101/155457v3.full.pdf
